# Supplementary material
Source: MDPI journal article supplement (https://www.mdpi.com/2073-4441/14/14/2250)

# SUPPLEMENTARY MATERIAL

**Table S1 A.** Mann-Whitney U Test comparison concentration in different season (flood vs. baseflow) in tributaries and main channel of the Ket River. Red color is for statistically significant differences.

| tributaries         |    |      |         |    |      |         | main channel |    |      |         |   |      |         | tributaries |   |         |  |  |  |  | main channel |  |  |  |  |  |  |
|---------------------|----|------|---------|----|------|---------|--------------|----|------|---------|---|------|---------|-------------|---|---------|--|--|--|--|--------------|--|--|--|--|--|--|
| variable            | U  | Z    | p-value | U  | Z    | p-value | variable     | U  | Z    | p-value | U | Z    | p-value | U           | Z | p-value |  |  |  |  |              |  |  |  |  |  |  |
| T <sub>water</sub>  | 5  | -4.7 | <0.001  | 0  | -2.9 | 0.003   | Cr           | 82 | 2.3  | 0.021   | 1 | 2.8  | 0.005   |             |   |         |  |  |  |  |              |  |  |  |  |  |  |
| pCO <sub>2</sub>    | 61 | -2.7 | 0.007   | -  | -    | -       | Mn           | 44 | -3.5 | <0.001  | 6 | -2.1 | 0.038   |             |   |         |  |  |  |  |              |  |  |  |  |  |  |
| FCO <sub>2</sub>    | 52 | -2.2 | 0.025   | -  | -    | -       | Fe           | 25 | -4.1 | <0.001  | 1 | -2.8 | 0.005   |             |   |         |  |  |  |  |              |  |  |  |  |  |  |
| PON                 | 0  | -4.9 | <0.001  | 0  | -2.9 | 0.003   | Ni           | 54 | 3.2  | 0.001   | 1 | 2.8  | 0.005   |             |   |         |  |  |  |  |              |  |  |  |  |  |  |
| POC                 | 4  | -4.8 | <0.001  | 0  | -2.9 | 0.003   | Cu           | 33 | 3.8  | <0.001  | 0 | 2.9  | 0.003   |             |   |         |  |  |  |  |              |  |  |  |  |  |  |
| TBC                 | 76 | -2.5 | 0.013   | -  | -    | -       | Ga           | 33 | 3.8  | <0.001  | 1 | 2.8  | 0.005   |             |   |         |  |  |  |  |              |  |  |  |  |  |  |
| pH                  | 73 | -2.6 | 0.009   | 4  | -2.4 | 0.018   | As           | 72 | -2.6 | 0.009   | 0 | -2.9 | 0.003   |             |   |         |  |  |  |  |              |  |  |  |  |  |  |
| S.C.                | 13 | -4.5 | <0.001  | 0  | -2.9 | 0.003   | Se           | 81 | 2.3  | 0.019   | 6 | 2.1  | 0.038   |             |   |         |  |  |  |  |              |  |  |  |  |  |  |
| SUVA <sub>254</sub> | 61 | -3.0 | 0.003   | -  | -    | -       | Sr           | 7  | -4.7 | <0.001  | 1 | -2.8 | 0.005   |             |   |         |  |  |  |  |              |  |  |  |  |  |  |
| Aromaticity         | -  | -    | -       | 4  | 2.4  | 0.018   | Y            | 50 | 3.3  | 0.001   | 0 | 2.9  | 0.003   |             |   |         |  |  |  |  |              |  |  |  |  |  |  |
| Humification        | 4  | 4.8  | <0.001  | 4  | 2.4  | 0.018   | Zr           | 54 | 3.2  | 0.001   | 0 | 2.9  | 0.003   |             |   |         |  |  |  |  |              |  |  |  |  |  |  |
| Cl                  | 60 | -3.0 | 0.003   | 19 | 0.2  | 0.830   | Nb           | 38 | 3.7  | <0.001  | 0 | 2.9  | 0.003   |             |   |         |  |  |  |  |              |  |  |  |  |  |  |
| SO <sub>4</sub>     | 26 | 4.1  | <0.001  | 0  | 2.9  | 0.003   | Mo           | 0  | -4.9 | <0.001  | 0 | -2.9 | 0.003   |             |   |         |  |  |  |  |              |  |  |  |  |  |  |
| DIC                 | 14 | -4.4 | <0.001  | 0  | -2.9 | 0.003   | Cd           | 31 | 3.9  | <0.001  | 0 | 2.9  | 0.003   |             |   |         |  |  |  |  |              |  |  |  |  |  |  |
| DOC                 | 76 | 2.5  | 0.013   | 2  | 2.6  | 0.008   | Sb           | 13 | 4.5  | <0.001  | 0 | 2.9  | 0.003   |             |   |         |  |  |  |  |              |  |  |  |  |  |  |
| Li                  | 24 | -4.1 | <0.001  | -  | -    | -       | Cs           | -  | -    | -       | 0 | 2.9  | 0.003   |             |   |         |  |  |  |  |              |  |  |  |  |  |  |
| Be                  | 44 | 3.5  | <0.001  | 0  | 2.9  | 0.003   | Ba           | 51 | -3.3 | 0.001   | 4 | -2.4 | 0.018   |             |   |         |  |  |  |  |              |  |  |  |  |  |  |
| B                   | 58 | -3.1 | 0.002   | 1  | -2.8 | 0.005   | La           | 54 | 3.2  | 0.001   | 0 | 2.9  | 0.003   |             |   |         |  |  |  |  |              |  |  |  |  |  |  |
| Na                  | 6  | -4.7 | <0.001  | 1  | -2.8 | 0.005   | Ce           | 32 | 3.9  | <0.001  | 0 | 2.9  | 0.003   |             |   |         |  |  |  |  |              |  |  |  |  |  |  |
| Mg                  | 6  | -4.7 | <0.001  | 1  | -2.8 | 0.005   | Pr           | 29 | 4.0  | <0.001  | 0 | 2.9  | 0.003   |             |   |         |  |  |  |  |              |  |  |  |  |  |  |
| Al                  | 10 | 4.6  | <0.001  | 1  | 2.8  | 0.005   | Nd           | 31 | 3.9  | <0.001  | 0 | 2.9  | 0.003   |             |   |         |  |  |  |  |              |  |  |  |  |  |  |
| Si                  | 0  | -4.9 | <0.001  | 0  | -2.9 | 0.003   | Sm           | 29 | 4.0  | <0.001  | 0 | 2.9  | 0.003   |             |   |         |  |  |  |  |              |  |  |  |  |  |  |
| P                   | 47 | -3.4 | 0.001   | 3  | -2.5 | 0.012   | Eu           | 34 | 3.8  | <0.001  | 0 | 2.9  | 0.003   |             |   |         |  |  |  |  |              |  |  |  |  |  |  |
| Ca                  | 15 | -4.4 | <0.001  | 2  | -2.6 | 0.008   | Gd           | 34 | 3.8  | <0.001  | 0 | 2.9  | 0.003   |             |   |         |  |  |  |  |              |  |  |  |  |  |  |
| Sc                  | 38 | -3.7 | <0.001  | -  | -    | -       | Tb           | 36 | 3.8  | <0.001  | 0 | 2.9  | 0.003   |             |   |         |  |  |  |  |              |  |  |  |  |  |  |
| Ti                  | 52 | 3.3  | 0.001   | 0  | 2.9  | 0.003   | Dy           | 37 | 3.7  | <0.001  | 0 | 2.9  | 0.003   |             |   |         |  |  |  |  |              |  |  |  |  |  |  |
|                     |    |      |         |    |      |         | Yb           | 59 | 3.0  | 0.002   | 0 | 2.9  | 0.003   |             |   |         |  |  |  |  |              |  |  |  |  |  |  |
|                     |    |      |         |    |      |         | Lu           | 65 | 2.8  | 0.004   | 0 | 2.9  | 0.003   |             |   |         |  |  |  |  |              |  |  |  |  |  |  |
|                     |    |      |         |    |      |         | Hf           | 39 | 3.7  | <0.001  | 0 | 2.9  | 0.003   |             |   |         |  |  |  |  |              |  |  |  |  |  |  |
|                     |    |      |         |    |      |         | W            | 81 | -2.3 | 0.019   | - | -    | -       |             |   |         |  |  |  |  |              |  |  |  |  |  |  |
|                     |    |      |         |    |      |         | Pb           | -  | -    | -       | 1 | 2.8  | 0.005   |             |   |         |  |  |  |  |              |  |  |  |  |  |  |
|                     |    |      |         |    |      |         | Th           | 23 | 4.2  | <0.001  | 0 | 2.9  | 0.003   |             |   |         |  |  |  |  |              |  |  |  |  |  |  |

**Table S1 B.** Mann-Whitney U Test comparison concentration tributaries and main channel in different seasons.

| <b>Flood</b>        | <b>U</b> | <b>Z</b> | <b>p-value</b> |
|---------------------|----------|----------|----------------|
| pCO <sub>2</sub>    | 26       | 2.9      | 0.004          |
| PON                 | 16       | -3.3     | 0.001          |
| POC                 | 26       | -2.8     | 0.005          |
| Cl                  | 32       | -2.6     | 0.010          |
| SO <sub>4</sub>     | 38       | -2.3     | 0.021          |
| B                   | 44       | -2.0     | 0.041          |
| Cu                  | 31       | -2.6     | 0.009          |
| Mo                  | 41       | -2.2     | 0.029          |
| Cs                  | 41       | -2.2     | 0.029          |
| W                   | 39       | -2.3     | 0.023          |
| Pb                  | 43       | -2.1     | 0.036          |
| U                   | 30       | -2.7     | 0.008          |
| <b>Baseflow</b>     | <b>U</b> | <b>Z</b> | <b>p-value</b> |
| T <sub>water</sub>  | 7        | -2.7     | 0.008          |
| pCO <sub>2</sub>    | 5        | 2.8      | 0.006          |
| TBC                 | 10       | 2.4      | 0.017          |
| pH                  | 13       | -2.2     | 0.031          |
| SUVA <sub>254</sub> | 14       | 2.0      | 0.044          |
| Humification        | 10       | -2.4     | 0.017          |
| SO <sub>4</sub>     | 6        | -2.8     | 0.006          |
| Cs                  | 11       | 2.3      | 0.022          |

**Table S2.** Mean±SD concentrations of elements and other measured parameters in the Ket River main stem and tributaries.

| Variable                        | Tributaries |             | Main channel |              |
|---------------------------------|-------------|-------------|--------------|--------------|
|                                 | Flood       | Base flow   | Flood        | Base flow    |
| Temp <sub>water</sub> , °C      | 9.27±2.11   | 14.9±1.24   | 9.93±2.27    | 16.5±0.54    |
| pH                              | 6.21±0.41   | 6.71±0.57   | 6.6±0.46     | 7.29±0.26    |
| S.C., µS/cm                     | 36.2±15.3   | 127±62.1    | 56.3±32.6    | 181±36.8     |
| Dissolved O <sub>2</sub> , mg/L | 8.35±1.12   | 8.02±1.13   | 9.47±1.07    | 8.78±0.18    |
| PON, mg/L                       | 0.07±0.04   | 0.64±0.27   | 0.16±0.06    | 0.96±0.22    |
| POC, mg/L                       | 2.2±1.18    | 8±2.36      | 3.29±0.47    | 9.49±1.98    |
| DIC, mg/L                       | 2.31±1.46   | 16.6±9.83   | 4.43±4.23    | 23±5.03      |
| DOC, mg/L                       | 22±4.04     | 16.5±7.35   | 20.7±3.62    | 15±1.35      |
| TBC *10 <sup>5</sup> cells/ml   | 5.72±3.2    | 8.69±3.21   | 6.56±3.06    | 4.94±2.15    |
| SUVA <sub>254</sub> , L/mg C/m  | 4.38±0.31   | 4.9±0.66    | 4.16±0.25    | 4.26±0.52    |
| Cl, mg/L                        | 0.09±0.06   | 0.16±0.07   | 0.16±0.06    | 0.17±0.01    |
| SO <sub>4</sub> , mg/L          | 1.39±1.13   | 0.31±0.14   | 2.59±1.3     | 0.58±0.18    |
| Li, µg/L                        | 0.84±0.23   | 1.76±0.63   | 1.05±0.34    | 1.3±0.23     |
| Be, µg/L                        | 0.03±0.01   | 0.01±0.01   | 0.03±0.01    | 0.01±0.00    |
| B, µg/L                         | 6.21±1.95   | 20.2±27.0   | 7.98±1.79    | 13.6±3.24    |
| Na, mg/L                        | 0.82±0.25   | 2.96±1.26   | 1.12±0.47    | 2.92±0.81    |
| Mg, mg/L                        | 0.9±0.35    | 3.76±1.59   | 1.31±0.71    | 4.19±1.06    |
| Al, mg/L                        | 197±91      | 41.8±32.7   | 187±88       | 32±16        |
| Si, mg/L                        | 2.60±0.62   | 8.13±2.7    | 2.99±0.31    | 5.61±0.65    |
| P, µg/L                         | 50±13       | 96.8±48.1   | 45±14        | 77±26        |
| Ca, mg/L                        | 4.57±2.4    | 18.6±9.36   | 7.06±4.15    | 22.4±6.66    |
| Sc, µg/L                        | 0.05±0.02   | 0.1±0.05    | 0.06±0.02    | 0.09±0.03    |
| Ti, µg/L                        | 1.9±1.21    | 0.81±0.43   | 3.31±2.36    | 0.64±0.11    |
| V, µg/L                         | 0.53±0.26   | 0.43±0.13   | 0.66±0.26    | 0.49±0.13    |
| Cr, µg/L                        | 0.5±0.19    | 0.36±0.12   | 0.57±0.19    | 0.26±0.04    |
| Mn, µg/L                        | 51.3±27.8   | 127±66.1    | 37.2±8.23    | 82.9±33.71   |
| Fe, mg/L                        | 0.68±0.2    | 2.78±1.57   | 0.6±0.25     | 1.66±0.67    |
| Co, µg/L                        | 0.22±0.11   | 0.21±0.1    | 0.22±0.06    | 0.17±0.08    |
| Ni, µg/L                        | 12.1±28.3   | 0.81±0.29   | 11.2±20.8    | 1±0.20       |
| Cu, µg/L                        | 1.09±0.61   | 0.33±0.39   | 1.89±0.77    | 0.38±0.10    |
| Zn, µg/L                        | 9.4±5.54    | 8.22±4.44   | 6.56±2.11    | 5.04±1.37    |
| Ga, µg/L                        | 0.05±0.02   | 0.02±0.01   | 0.07±0.03    | 0.02±0.00    |
| Ge, µg/L                        | 0.06±0.02   | 0.05±0.02   | 0.06±0.02    | 0.04±0.01    |
| As, µg/L                        | 0.81±0.31   | 1.37±0.83   | 0.66±0.13    | 1.36±0.17    |
| Se, µg/L                        | 0.05±0.02   | 0.04±0.01   | 0.07±0.02    | 0.05±0.01    |
| Rb, µg/L                        | 0.95±0.43   | 0.95±0.37   | 0.7±0.12     | 0.72±0.07    |
| Sr, µg/L                        | 23.3±9.4    | 99.1±45.9   | 36.2±19.8    | 108±29.0     |
| Y, µg/L                         | 0.28±0.13   | 0.14±0.09   | 0.37±0.11    | 0.13±0.04    |
| Zr, µg/L                        | 0.25±0.16   | 0.11±0.05   | 0.36±0.18    | 0.1±0.01     |
| Nb, µg/L                        | 0.01±0.01   | 0.003±0.002 | 0.01±0.01    | 0.003±0.00   |
| Mo, µg/L                        | 0.03±0.02   | 0.27±0.12   | 0.05±0.02    | 0.27±0.15    |
| Cd, µg/L                        | 0.01±0.01   | 0.01±0.002  | 0.01±0.004   | 0.005±0.001  |
| Sb, µg/L                        | 0.05±0.01   | 0.02±0.01   | 0.05±0.01    | 0.03±0.005   |
| Cs, µg/L                        | 0.004±0.003 | 0.01±0.02   | 0.01±0.01    | 0.001±0.0006 |
| Ba, µg/L                        | 15.6±3.85   | 22.7±5.92   | 15.8±3.23    | 22.1±4.76    |
| La, µg/L                        | 0.23±0.1    | 0.11±0.08   | 0.30±0.09    | 0.09±0.02    |
| Ce, µg/L                        | 0.53±0.21   | 0.19±0.11   | 0.62±0.18    | 0.18±0.06    |
| Pr, µg/L                        | 0.07±0.03   | 0.02±0.01   | 0.08±0.03    | 0.02±0.01    |
| Nd, µg/L                        | 0.25±0.11   | 0.09±0.05   | 0.31±0.1     | 0.09±0.03    |

|          |             |             |             |              |
|----------|-------------|-------------|-------------|--------------|
| Sm, µg/L | 0.06±0.03   | 0.02±0.01   | 0.08±0.02   | 0.02±0.01    |
| Eu, µg/L | 0.01±0.01   | 0.01±0.003  | 0.02±0.01   | 0.007±0.001  |
| Gd, µg/L | 0.06±0.03   | 0.02±0.01   | 0.08±0.02   | 0.02±0.01    |
| Tb, µg/L | 0.01±0.004  | 0.004±0.002 | 0.01±0.003  | 0.004±0.001  |
| Dy, µg/L | 0.05±0.02   | 0.02±0.01   | 0.07±0.02   | 0.02±0.01    |
| Ho, µg/L | 0.01±0.005  | 0.005±0.003 | 0.01±0.004  | 0.005±0.001  |
| Er, µg/L | 0.03±0.01   | 0.01±0.01   | 0.04±0.01   | 0.01±0.004   |
| Tm, µg/L | 0.004±0.002 | 0.002±0.001 | 0.01±0.002  | 0.002±0.001  |
| Yb, µg/L | 0.03±0.01   | 0.01±0.01   | 0.04±0.01   | 0.01±0.003   |
| Lu, µg/L | 0.004±0.002 | 0.002±0.001 | 0.01±0.002  | 0.002±0.001  |
| Hf, µg/L | 0.01±0.01   | 0.004±0.002 | 0.01±0.01   | 0.003±0.0003 |
| W, µg/L  | 0.002±0.001 | 0.01±0.01   | 0.003±0.001 | 0.003±0.001  |
| Tl, µg/L | 0.003±0.001 | 0.003±0.002 | 0.02±0.03   | 0.002±0.001  |
| Pb, µg/L | 0.19±0.26   | 0.1±0.06    | 0.23±0.12   | 0.08±0.02    |
| Bi, µg/L | 0.02±0.03   | 0.01±0.02   | 0.05±0.06   | 0.01±0.02    |
| Th, µg/L | 0.04±0.02   | 0.01±0.01   | 0.04±0.02   | 0.01±0.001   |
| U, µg/L  | 0.02±0.01   | 0.02±0.02   | 0.03±0.02   | 0.05±0.03    |

---

**Table S3.** Pairwise Pearson correlations of major and trace element concentrations in the Ket River (main stem and tributaries) during summer baseflow and main hydrochemical parameters of the water column and land cover. Significant ( $p < 0.05$ ) correlations are given in red and most significant ( $p < 0.01$ ) are highlighted in pink.

| baseflow                             | Li   | Na   | Mg   | Al   | Si   | P    | Ca   | Ti   | V    | Cr   | Mn   |
|--------------------------------------|------|------|------|------|------|------|------|------|------|------|------|
| MAAT                                 | 0,5  | 0,4  | 0,2  | -0,3 | 0,3  | 0,2  | 0,2  | -0,2 | 0,3  | 0,0  | 0,6  |
| MAP                                  | 0,1  | -0,3 | -0,4 | 0,3  | 0,2  | 0,3  | -0,5 | 0,5  | -0,3 | 0,6  | 0,0  |
| T <sub>water</sub>                   | -0,4 | -0,2 | 0,0  | 0,1  | -0,5 | 0,1  | 0,0  | 0,0  | 0,4  | -0,3 | -0,3 |
| TBC                                  | -0,1 | -0,4 | -0,5 | 0,4  | 0,1  | 0,4  | -0,6 | 0,6  | -0,1 | 0,6  | 0,0  |
| Cl <sup>-</sup>                      | 0,6  | 0,7  | 0,4  | -0,3 | 0,4  | -0,1 | 0,5  | -0,4 | 0,2  | -0,4 | 0,4  |
| SO <sub>4</sub> <sup>2-</sup>        | 0,0  | 0,3  | 0,3  | -0,2 | -0,2 | 0,0  | 0,4  | -0,3 | 0,3  | -0,5 | 0,2  |
| DIC                                  | 0,2  | 0,5  | 0,6  | -0,5 | 0,1  | -0,3 | 0,7  | -0,6 | 0,1  | -0,6 | 0,3  |
| DOC                                  | -0,6 | -0,7 | -0,4 | 0,4  | -0,6 | 0,1  | -0,4 | 0,4  | 0,0  | 0,3  | -0,4 |
| SUVA254                              | 0,2  | -0,2 | -0,5 | 0,5  | 0,3  | 0,6  | -0,6 | 0,7  | 0,2  | 0,6  | -0,1 |
| Watershed area                       | 0,1  | -0,3 | -0,5 | 0,2  | 0,2  | 0,1  | -0,5 | 0,4  | -0,2 | 0,3  | -0,4 |
| Dark Needleleaf Forest               | -0,1 | 0,1  | 0,2  | 0,0  | -0,2 | -0,4 | 0,2  | -0,3 | 0,4  | -0,3 | -0,4 |
| Light Needleleaf Forest              | -0,2 | 0,0  | 0,1  | 0,1  | -0,3 | -0,4 | 0,1  | -0,1 | 0,3  | -0,2 | -0,6 |
| Broadleaf Forest                     | -0,1 | 0,0  | 0,1  | 0,1  | -0,2 | -0,3 | 0,1  | -0,1 | 0,3  | -0,2 | -0,5 |
| Mixed Forest                         | -0,1 | 0,1  | 0,2  | 0,0  | -0,1 | -0,3 | 0,2  | -0,2 | 0,5  | -0,3 | -0,4 |
| Peatlands and bogs                   | -0,2 | -0,2 | 0,0  | 0,0  | -0,2 | -0,4 | 0,0  | -0,1 | 0,3  | -0,1 | -0,7 |
| Riparian Vegetation                  | -0,1 | -0,2 | -0,1 | 0,0  | -0,2 | 0,0  | -0,1 | 0,0  | 0,6  | -0,1 | -0,4 |
| Grassland                            | -0,1 | 0,1  | 0,3  | -0,1 | -0,2 | -0,5 | 0,4  | -0,3 | 0,5  | -0,4 | -0,4 |
| Recent Burns                         | -0,1 | 0,0  | 0,1  | 0,1  | -0,1 | -0,2 | 0,1  | -0,1 | 0,4  | 0,0  | -0,5 |
| Water Bodies                         | -0,1 | -0,3 | -0,2 | -0,1 | 0,0  | -0,4 | -0,2 | 0,0  | 0,2  | 0,0  | -0,8 |
| Phytomass                            | 0,0  | 0,5  | 0,5  | 0,0  | -0,2 | -0,1 | 0,50 | -0,4 | 0,2  | -0,4 | 0,2  |
| Upper Cretac, Maastr. - Lower Paleoc | -0,4 | 0,0  | 0,3  | 0,0  | -0,4 | -0,4 | 0,3  | -0,3 | 0,4  | -0,4 | -0,4 |
| Paleogene. Upper Oligocene           | -0,4 | 0,0  | 0,2  | -0,1 | -0,5 | -0,5 | 0,3  | -0,3 | 0,2  | -0,5 | -0,3 |
| Cretaceous. Coniacian - Campanian    | -0,3 | -0,1 | 0,1  | -0,1 | -0,5 | -0,2 | 0,2  | -0,2 | 0,3  | -0,4 | -0,3 |
| Neogene. Lower -Middle Miocene       | -0,2 | -0,3 | -0,2 | 0,0  | -0,1 | -0,3 | -0,1 | 0,0  | 0,3  | -0,1 | -0,7 |
| Upper Pliocene-Eopleistocene         | -0,2 | 0,0  | 0,1  | 0,1  | -0,3 | -0,3 | 0,1  | -0,1 | 0,4  | -0,2 | -0,5 |
| Cretaceous. Cenomanian - Turonian    | -0,3 | -0,1 | 0,1  | -0,1 | -0,5 | -0,2 | 0,2  | -0,2 | 0,3  | -0,4 | -0,3 |
| Neogene. Lower Miocene               | 0,2  | 0,1  | 0,0  | -0,5 | 0,1  | -0,5 | 0,2  | -0,3 | 0,0  | -0,5 | -0,2 |

Table S3. Continued.

| baseflow                             | Fe   | Co   | Cu   | Zn   | Ga   | Ge   | As   | Rb   |
|--------------------------------------|------|------|------|------|------|------|------|------|
| MAAT                                 | 0,1  | 0,4  | -0,3 | -0,2 | -0,3 | 0,0  | 0,1  | 0,3  |
| MAP                                  | 0,4  | 0,0  | -0,1 | 0,7  | 0,4  | 0,5  | -0,1 | 0,0  |
| T <sub>water</sub>                   | -0,1 | 0,0  | 0,5  | -0,5 | 0,2  | -0,1 | 0,6  | -0,5 |
| TBC                                  | 0,6  | -0,1 | 0,1  | 0,7  | 0,4  | 0,6  | 0,0  | -0,2 |
| Cl <sup>-</sup>                      | -0,2 | 0,5  | -0,3 | -0,4 | -0,2 | -0,2 | -0,2 | 0,7  |
| SO <sub>4</sub> <sup>2-</sup>        | -0,3 | 0,2  | -0,1 | -0,6 | -0,3 | -0,3 | 0,3  | -0,1 |
| DIC                                  | -0,5 | 0,2  | -0,2 | -0,7 | -0,4 | -0,6 | 0,0  | 0,3  |
| DOC                                  | 0,2  | -0,3 | 0,6  | 0,2  | 0,4  | 0,3  | 0,3  | -0,7 |
| SUVA <sub>254</sub>                  | 0,7  | 0,0  | 0,1  | 0,7  | 0,5  | 0,7  | 0,0  | 0,0  |
| Watershed area                       | 0,4  | -0,5 | -0,3 | 0,5  | 0,3  | 0,5  | -0,3 | 0,2  |
| Dark Needleleaf Forest               | -0,3 | -0,3 | 0,2  | -0,3 | 0,0  | -0,2 | -0,1 | 0,0  |
| Light Needleleaf Forest              | -0,2 | -0,4 | 0,3  | -0,2 | 0,1  | -0,1 | 0,0  | -0,1 |
| Broadleaf Forest                     | -0,2 | -0,4 | 0,3  | -0,2 | 0,1  | -0,1 | -0,1 | 0,0  |
| Mixed Forest                         | -0,2 | -0,2 | 0,2  | -0,3 | 0,1  | -0,1 | 0,0  | 0,0  |
| Peatlands and bogs                   | -0,1 | -0,6 | 0,3  | -0,1 | 0,3  | -0,1 | -0,2 | 0,0  |
| Riparian Vegetation                  | 0,2  | -0,3 | 0,3  | -0,2 | 0,2  | 0,1  | 0,1  | -0,2 |
| Grassland                            | -0,4 | -0,3 | 0,3  | -0,4 | 0,0  | -0,3 | -0,1 | 0,1  |
| Recent Burns                         | -0,1 | -0,3 | 0,2  | -0,1 | 0,2  | 0,0  | -0,1 | 0,0  |
| Water Bodies                         | 0,1  | -0,7 | 0,1  | 0,1  | 0,2  | 0,0  | -0,4 | 0,0  |
| Phytomass                            | -0,5 | 0,4  | 0,1  | -0,5 | -0,3 | -0,4 | 0,3  | 0,0  |
| Upper Cretac, Maastr. - Lower Paleoc | -0,4 | -0,2 | 0,5  | -0,5 | -0,1 | -0,3 | 0,1  | -0,3 |
| Paleogene. Upper Oligocene           | -0,5 | -0,2 | 0,5  | -0,5 | -0,1 | -0,4 | 0,1  | -0,2 |
| Cretaceous. Coniacian - Campanian    | -0,2 | -0,3 | 0,3  | -0,4 | -0,1 | -0,2 | 0,2  | -0,3 |
| Neogene. Lower -Middle Miocene       | 0,1  | -0,7 | 0,2  | 0,0  | 0,2  | 0,0  | -0,3 | 0,0  |
| Upper Pliocene-Eopleistocene         | -0,2 | -0,3 | 0,3  | -0,2 | 0,1  | -0,1 | 0,1  | -0,1 |
| Cretaceous. Cenomanian - Turonian    | -0,2 | -0,3 | 0,3  | -0,4 | -0,1 | -0,2 | 0,2  | -0,3 |
| Neogene. Lower Miocene               | -0,2 | -0,2 | -0,1 | -0,3 | 0,0  | -0,2 | -0,4 | 0,4  |

Table S3. Continued.

| baseflow                             | Sr   | Y    | Zr   | Nb   | Cd   | Sb   | Cs   | Ba   |
|--------------------------------------|------|------|------|------|------|------|------|------|
| MAAT                                 | 0,1  | -0,2 | -0,3 | -0,1 | -0,2 | -0,3 | 0,2  | 0,1  |
| MAP                                  | -0,3 | 0,3  | 0,6  | 0,3  | 0,5  | 0,0  | 0,4  | -0,1 |
| T <sub>water</sub>                   | -0,1 | 0,2  | 0,1  | 0,1  | -0,2 | 0,6  | -0,6 | -0,3 |
| TBC                                  | -0,5 | 0,4  | 0,7  | 0,4  | 0,6  | 0,1  | 0,3  | -0,3 |
| Cl <sup>-</sup>                      | 0,5  | -0,2 | -0,6 | -0,2 | -0,4 | -0,6 | 0,0  | 0,4  |
| SO <sub>4</sub> <sup>2-</sup>        | 0,3  | -0,2 | -0,5 | -0,1 | -0,5 | -0,1 | -0,4 | 0,1  |
| DIC                                  | 0,6  | -0,5 | -0,8 | -0,4 | -0,6 | -0,3 | -0,2 | 0,4  |
| DOC                                  | -0,5 | 0,3  | 0,7  | 0,3  | 0,4  | 0,7  | -0,3 | -0,5 |
| SUVA254                              | -0,5 | 0,6  | 0,7  | 0,5  | 0,4  | 0,0  | 0,3  | -0,3 |
| Watershed area                       | -0,4 | 0,4  | 0,1  | 0,2  | -0,1 | -0,3 | 0,2  | -0,3 |
| Dark Needleleaf Forest               | 0,2  | 0,1  | -0,3 | -0,2 | -0,3 | 0,1  | -0,5 | 0,1  |
| Light Needleleaf Forest              | 0,1  | 0,2  | -0,1 | -0,2 | -0,1 | 0,2  | -0,5 | 0,0  |
| Broadleaf Forest                     | 0,1  | 0,2  | -0,1 | -0,2 | -0,1 | 0,2  | -0,4 | 0,0  |
| Mixed Forest                         | 0,2  | 0,2  | -0,2 | -0,1 | -0,3 | 0,0  | -0,4 | 0,1  |
| Peatlands and bogs                   | 0,0  | 0,4  | 0,1  | -0,2 | -0,1 | 0,2  | -0,4 | -0,1 |
| Riparian Vegetation                  | -0,2 | 0,3  | 0,1  | -0,1 | -0,2 | 0,2  | -0,5 | -0,3 |
| Grassland                            | 0,3  | 0,1  | -0,3 | -0,3 | -0,2 | 0,1  | -0,5 | 0,2  |
| Recent Burns                         | 0,0  | 0,3  | 0,0  | -0,1 | -0,1 | 0,1  | -0,3 | 0,0  |
| Water Bodies                         | -0,2 | 0,4  | 0,2  | -0,1 | -0,2 | 0,0  | -0,3 | -0,2 |
| Phytomass                            | 0,5  | -0,3 | -0,5 | -0,2 | -0,2 | 0,1  | -0,3 | 0,3  |
| Upper Cretac, Maastr. - Lower Paleoc | 0,2  | 0,0  | -0,2 | -0,2 | -0,1 | 0,3  | -0,7 | 0,0  |
| Paleogene. Upper Oligocene           | 0,2  | -0,1 | -0,3 | -0,3 | -0,2 | 0,3  | -0,6 | 0,0  |
| Cretaceous. Coniacian - Campanian    | 0,0  | 0,0  | -0,3 | -0,1 | -0,3 | 0,3  | -0,6 | -0,2 |
| Neogene. Lower -Middle Miocene       | -0,2 | 0,4  | 0,1  | -0,1 | -0,2 | 0,1  | -0,4 | -0,2 |
| Upper Pliocene-Eopleistocene         | 0,1  | 0,2  | -0,1 | -0,1 | -0,1 | 0,2  | -0,4 | 0,0  |
| Cretaceous. Cenomanian - Turonian    | 0,0  | 0,0  | -0,3 | -0,2 | -0,3 | 0,3  | -0,6 | -0,2 |
| Neogene. Lower Miocene               | 0,0  | 0,1  | -0,4 | -0,3 | -0,6 | -0,2 | -0,2 | 0,0  |

Table S3. Continued.

| baseflow                             | La   | Ce   | Pr   | Yb   | Hf   | Tl   | Pb   | Bi   | Th   | U    |
|--------------------------------------|------|------|------|------|------|------|------|------|------|------|
| MAAT                                 | -0,3 | -0,3 | -0,2 | -0,1 | -0,4 | 0,1  | -0,2 | 0,1  | -0,1 | -0,1 |
| MAP                                  | 0,4  | 0,3  | 0,3  | 0,4  | 0,3  | 0,2  | 0,5  | 0,1  | 0,3  | -0,5 |
| T <sub>water</sub>                   | 0,1  | 0,1  | 0,1  | 0,0  | 0,3  | -0,3 | -0,1 | 0,1  | 0,2  | 0,4  |
| TBC                                  | 0,5  | 0,4  | 0,4  | 0,4  | 0,3  | -0,1 | 0,7  | 0,0  | 0,3  | -0,5 |
| Cl <sup>-</sup>                      | -0,3 | -0,2 | -0,1 | -0,2 | -0,5 | 0,2  | -0,4 | -0,3 | -0,1 | 0,2  |
| SO <sub>4</sub> <sup>2-</sup>        | -0,3 | -0,3 | -0,3 | -0,3 | -0,2 | 0,0  | -0,4 | 0,2  | -0,1 | 0,4  |
| DIC                                  | -0,5 | -0,5 | -0,5 | -0,5 | -0,6 | 0,0  | -0,7 | -0,2 | -0,4 | 0,4  |
| DOC                                  | 0,5  | 0,4  | 0,4  | 0,3  | 0,5  | -0,3 | 0,5  | 0,2  | 0,2  | 0,0  |
| SUVA254                              | 0,7  | 0,7  | 0,6  | 0,7  | 0,5  | 0,1  | 0,7  | 0,0  | 0,6  | -0,5 |
| Watershed area                       | 0,4  | 0,4  | 0,3  | 0,4  | 0,2  | 0,5  | 0,2  | -0,2 | 0,4  | -0,6 |
| Dark Needleleaf Forest               | 0,0  | 0,1  | 0,0  | -0,1 | 0,1  | 0,1  | -0,3 | -0,1 | 0,0  | 0,4  |
| Light Needleleaf Forest              | 0,1  | 0,2  | 0,1  | 0,0  | 0,3  | 0,1  | -0,2 | -0,1 | 0,0  | 0,4  |
| Broadleaf Forest                     | 0,1  | 0,1  | 0,1  | 0,0  | 0,2  | 0,1  | -0,1 | -0,1 | 0,0  | 0,3  |
| Mixed Forest                         | 0,0  | 0,1  | 0,1  | 0,0  | 0,2  | 0,2  | -0,3 | 0,1  | 0,1  | 0,4  |
| Peatlands and bogs                   | 0,3  | 0,3  | 0,2  | 0,2  | 0,4  | 0,3  | -0,1 | -0,2 | 0,1  | 0,2  |
| Riparian Vegetation                  | 0,2  | 0,2  | 0,1  | 0,2  | 0,3  | 0,0  | 0,0  | -0,2 | 0,1  | 0,2  |
| Grassland                            | 0,0  | 0,0  | 0,0  | -0,1 | 0,1  | 0,0  | -0,3 | -0,1 | -0,1 | 0,5  |
| Recent Burns                         | 0,2  | 0,2  | 0,2  | 0,2  | 0,3  | 0,3  | -0,1 | 0,1  | 0,2  | 0,2  |
| Water Bodies                         | 0,3  | 0,3  | 0,3  | 0,3  | 0,3  | 0,2  | 0,0  | -0,4 | 0,0  | 0,1  |
| Phytomass                            | -0,4 | -0,3 | -0,3 | -0,4 | -0,2 | -0,1 | -0,4 | 0,4  | -0,1 | 0,5  |
| Upper Cretac, Maastr. - Lower Paleoc | -0,1 | 0,0  | 0,0  | -0,2 | 0,0  | -0,2 | -0,2 | -0,1 | -0,2 | 0,6  |
| Paleogene. Upper Oligocene           | -0,1 | 0,0  | -0,1 | -0,2 | 0,0  | -0,2 | -0,3 | -0,3 | -0,2 | 0,6  |
| Cretaceous. Coniacian - Campanian    | -0,1 | -0,1 | -0,1 | -0,2 | 0,0  | -0,2 | -0,2 | -0,1 | 0,0  | 0,4  |
| Neogene. Lower -Middle Miocene       | 0,3  | 0,3  | 0,2  | 0,3  | 0,3  | 0,1  | 0,0  | -0,4 | 0,1  | 0,2  |
| Upper Pliocene-Eopleistocene         | 0,1  | 0,2  | 0,1  | 0,1  | 0,3  | 0,2  | -0,2 | 0,2  | 0,1  | 0,3  |
| Cretaceous. Cenomanian - Turonian    | -0,1 | -0,1 | -0,1 | -0,2 | 0,0  | -0,2 | -0,3 | -0,1 | 0,0  | 0,4  |
| Neogene. Lower Miocene               | 0,1  | 0,0  | 0,0  | 0,1  | -0,3 | 0,2  | -0,4 | -0,8 | -0,2 | 0,2  |



**Table S4.** Hydrochemical parameters of the Taz River basin (stem and tributaries), July 2019.

| <b>Parameter</b>                                           | <b>main stem</b> | <b>tributaries</b> | <b>Element</b>         | <b>main stem</b> | <b>tributaries</b> |
|------------------------------------------------------------|------------------|--------------------|------------------------|------------------|--------------------|
| T <sub>water</sub> , °C                                    | 18.8±0.65        | 18.7±1.71          | Ge, µg L <sup>-1</sup> | 0.06±0.01        | 0.07±0.02          |
| pH                                                         | 6.87±0.33        | 6.76±0.37          | As, µg L <sup>-1</sup> | 1.18±0.04        | 1.4±0.39           |
| O <sub>2</sub> , mg L <sup>-1</sup>                        | 8.4±0.89         | 7.11±2.37          | Se, µg L <sup>-1</sup> | 0.04±0.003       | 0.04±0.01          |
| SC, µS cm <sup>-1</sup>                                    | 60.4±12.6        | 58.7±25.4          | Rb, µg L <sup>-1</sup> | 0.67±0.16        | 0.56±0.19          |
| TBC, *10 <sup>5</sup> cells ml <sup>-1</sup>               | 15.8±5.83        | 17.5±10.2          | Sr, µg L <sup>-1</sup> | 24.7±4.93        | 22.4±5.7           |
| Cl <sup>-</sup> , mg L <sup>-1</sup>                       | 0.17±0.08        | 1.37±2.49          | Y, µg L <sup>-1</sup>  | 0.27±0.07        | 0.25±0.12          |
| SO <sub>4</sub> <sup>2-</sup> , mg L <sup>-1</sup>         | 0.69±0.16        | 0.68±0.52          | Zr, µg L <sup>-1</sup> | 0.13±0.02        | 0.16±0.06          |
| DIC, mg L <sup>-1</sup>                                    | 6.16±1.67        | 5.73±2.83          | Nb, µg L <sup>-1</sup> | 0.003±0.0005     | 0.003±0.001        |
| DOC, mg L <sup>-1</sup>                                    | 12.7±0.68        | 13.2±3.36          | Mo, µg L <sup>-1</sup> | 0.12±0.05        | 0.19±0.35          |
| PON, mg L <sup>-1</sup>                                    | 0.36±0.07        | 0.44±0.31          | Cd, µg L <sup>-1</sup> | 0.004±0.003      | 0.007±0.006        |
| POC, mg L <sup>-1</sup>                                    | 5.01±0.51        | 6.98±3.43          | Sn, µg L <sup>-1</sup> | 0.005±0.001      | 0.005±0.002        |
| SUVA <sub>254</sub> , L mg C <sup>-1</sup> m <sup>-1</sup> | 4.73±0.16        | 4.89±0.43          | Sb, µg L <sup>-1</sup> | 0.02±0.003       | 0.03±0.01          |
| P-PO <sub>4</sub> , µg L <sup>-1</sup>                     | 41.5±8.53        | 42.2±25.9          | Te, µg L <sup>-1</sup> | 0.004±0.003      | 0.004±0.002        |
| N-NO <sub>3</sub> , µg L <sup>-1</sup>                     | 2.56±0.27        | 3.66±2.05          | Cs, µg L <sup>-1</sup> | 0.0007±0.0003    | 0.001±0.001        |
| N-NH <sub>4</sub> , µg L <sup>-1</sup>                     | 155±12.9         | 184±50             | Ba, µg L <sup>-1</sup> | 4.16±0.54        | 4.25±1.26          |
| N <sub>tot</sub> , µg L <sup>-1</sup>                      | 17.2±2.25        | 35.5±21.3          | La, µg L <sup>-1</sup> | 0.17±0.05        | 0.15±0.07          |
| Li, µg L <sup>-1</sup>                                     | 337±43.2         | 357±68.3           | Ce, µg L <sup>-1</sup> | 0.31±0.09        | 0.33±0.17          |
| Be, µg L <sup>-1</sup>                                     | 0.65±0.02        | 0.76±0.25          | Pr, µg L <sup>-1</sup> | 0.05±0.01        | 0.04±0.02          |
| B, µg L <sup>-1</sup>                                      | 0.014±0.002      | 0.02±0.007         | Nd, µg L <sup>-1</sup> | 0.19±0.05        | 0.17±0.08          |
| Na, mg L <sup>-1</sup>                                     | 5.91±0.39        | 7.65±3.66          | Sm, µg L <sup>-1</sup> | 0.05±0.01        | 0.05±0.02          |
| Mg, mg L <sup>-1</sup>                                     | 1.57±0.23        | 2.43±2.43          | Eu, µg L <sup>-1</sup> | 0.01±0.003       | 0.01±0.004         |
| Al, µg L <sup>-1</sup>                                     | 2.48±0.49        | 2.39±0.91          | Gd, µg L <sup>-1</sup> | 0.05±0.01        | 0.05±0.02          |
| Si, mg L <sup>-1</sup>                                     | 44.6±45.2        | 41±18.4            | Tb, µg L <sup>-1</sup> | 0.007±0.002      | 0.006±0.003        |
| P, µg L <sup>-1</sup>                                      | 3.38±0.89        | 3.46±1.46          | Dy, µg L <sup>-1</sup> | 0.04±0.01        | 0.04±0.02          |
| K, µg L <sup>-1</sup>                                      | 123±13.6         | 147±79.7           | Ho, µg L <sup>-1</sup> | 0.01±0.002       | 0.008±0.003        |
| Ca, mg L <sup>-1</sup>                                     | 295±31.2         | 297±100            | Er, µg L <sup>-1</sup> | 0.03±0.01        | 0.02±0.01          |
| Sc, µg L <sup>-1</sup>                                     | 5.91±1.32        | 5.18±1.96          | Tm, µg L <sup>-1</sup> | 0.004±0.0008     | 0.003±0.001        |
| Ti, µg L <sup>-1</sup>                                     | 0.06±0.008       | 0.06±0.01          | Yb, µg L <sup>-1</sup> | 0.02±0.005       | 0.02±0.009         |
| V, µg L <sup>-1</sup>                                      | 0.89±0.19        | 1.01±0.32          | Lu, µg L <sup>-1</sup> | 0.003±0.001      | 0.003±0.001        |
| Cr, µg L <sup>-1</sup>                                     | 1.03±0.17        | 0.87±0.24          | Hf, µg L <sup>-1</sup> | 0.004±0.001      | 0.005±0.002        |
| Mn, µg L <sup>-1</sup>                                     | 0.34±0.03        | 0.39±0.08          | W, µg L <sup>-1</sup>  | 0.002±0.0004     | 0.004±0.003        |
| Fe, mg L <sup>-1</sup>                                     | 24.5±16.7        | 107±90.8           | Tl, µg L <sup>-1</sup> | 0.002±0.004      | 0.005±0.01         |
| Co, µg L <sup>-1</sup>                                     | 0.75±0.12        | 0.96±0.5           | Pb, µg L <sup>-1</sup> | 0.05±0.01        | 0.06±0.02          |
| Ni, µg L <sup>-1</sup>                                     | 0.08±0.02        | 0.33±0.21          | Bi, µg L <sup>-1</sup> | 0.005±0.005      | 0.008±0.01         |
| Cu, µg L <sup>-1</sup>                                     | 1.2±0.27         | 1.43±0.55          | Th, µg L <sup>-1</sup> | 0.01±0.003       | 0.02±0.01          |
| Zn, µg L <sup>-1</sup>                                     | 0.85±0.18        | 0.86±0.49          | U, µg L <sup>-1</sup>  | 0.01±0.003       | 0.01±0.01          |
| Ga, µg L <sup>-1</sup>                                     | 2.62±0.97        | 3.96±2.55          |                        |                  |                    |
|                                                            | 0.03±0.009       | 0.03±0.01          |                        |                  |                    |

**Table S5.** Pearson pairwise correlations of major and trace elements of the river water (Taz and tributaries) with landscape parameters, vegetation coverage and climate. Significant ( $p < 0.05$ ) correlations are given in red and most significant ( $p < 0.01$ ) are highlighted in pink.

| Environmental parameter              | pH    | S.C.  | Cl    | SO <sub>4</sub> | DIC   | DOC   | P <sub>tot</sub> | NO <sub>2</sub> | NO <sub>3</sub> | NH <sub>4</sub> | N <sub>tot</sub> |
|--------------------------------------|-------|-------|-------|-----------------|-------|-------|------------------|-----------------|-----------------|-----------------|------------------|
| Swatershed                           | 0.18  | -0.12 | -0.17 | -0.12           | -0.05 | -0.06 | -0.14            | -0.16           | 0.07            | -0.29           | -0.20            |
| Dark Needleleaf                      | -0.34 | -0.45 | -0.40 | -0.47           | -0.33 | 0.29  | 0.40             | 0.07            | 0.30            | 0.08            | 0.51             |
| Light coniferous and broadleaf mixed | -0.43 | -0.36 | -0.35 | -0.48           | -0.24 | 0.60  | 0.39             | 0.71            | 0.69            | 0.40            | 0.00             |
| Decid Needleleaf                     | 0.19  | 0.14  | -0.49 | -0.33           | 0.35  | 0.45  | 0.36             | -0.15           | 0.15            | 0.07            | 0.03             |
| Tundra                               | 0.39  | 0.41  | 0.77  | 0.84            | 0.16  | -0.72 | -0.77            | -0.44           | -0.78           | -0.39           | -0.45            |
| Riparian                             | -0.11 | 0.07  | 0.38  | 0.32            | -0.11 | -0.05 | -0.54            | -0.43           | -0.58           | -0.42           | 0.04             |
| Bogs and Water                       | -0.26 | -0.28 | -0.23 | -0.33           | -0.26 | -0.02 | 0.19             | -0.02           | 0.09            | 0.03            | 0.61             |
| Burns                                | -0.01 | -0.15 | -0.22 | -0.17           | -0.05 | 0.01  | -0.17            | -0.18           | 0.00            | -0.41           | -0.27            |
| Phytomass                            | 0.05  | -0.01 | -0.48 | -0.38           | 0.19  | 0.40  | 0.13             | -0.25           | 0.09            | -0.24           | -0.22            |
| Org. C in soil, 0-30 cm              | -0.17 | -0.05 | 0.10  | 0.07            | -0.09 | -0.07 | -0.22            | -0.04           | -0.08           | -0.17           | -0.09            |
| Org. C in soil, 0-100 cm             | -0.21 | -0.08 | 0.08  | 0.01            | -0.11 | -0.06 | -0.27            | -0.05           | -0.10           | -0.22           | -0.14            |
| Permafrost                           | -0.17 | -0.15 | -0.21 | -0.12           | -0.08 | -0.02 | -0.06            | -0.26           | -0.13           | -0.42           | -0.13            |
|                                      | Si    | Li    | Be    | B               | Na    | Mg    | Al               | Si              | P               | K               | Ca               |
| Swatershed                           | 0.37  | 0.00  | 0.23  | -0.10           | -0.16 | -0.08 | -0.06            | -0.17           | -0.19           | -0.15           | -0.04            |
| Dark Needleleaf                      | 0.00  | -0.09 | 0.11  | -0.37           | -0.41 | -0.36 | 0.49             | -0.44           | -0.16           | -0.14           | -0.29            |
| Light coniferous and broadleaf mixed | 0.12  | -0.41 | 0.43  | -0.37           | -0.40 | -0.36 | 0.36             | 0.17            | 0.25            | -0.59           | -0.16            |
| Decid Needleleaf                     | 0.74  | -0.55 | -0.22 | -0.22           | -0.31 | 0.47  | 0.06             | 0.06            | 0.42            | -0.56           | 0.60             |
| Tundra                               | -0.33 | 0.69  | -0.25 | 0.62            | 0.70  | 0.12  | -0.36            | 0.37            | -0.25           | 0.74            | -0.06            |
| Riparian                             | -0.75 | 0.45  | 0.12  | 0.05            | 0.13  | -0.01 | -0.05            | -0.02           | -0.27           | 0.33            | -0.05            |
| Bogs and Water                       | -0.64 | -0.08 | 0.11  | -0.23           | -0.24 | -0.19 | 0.02             | -0.65           | -0.24           | 0.06            | -0.27            |
| Burns                                | 0.38  | -0.01 | 0.20  | -0.14           | -0.20 | -0.11 | 0.28             | -0.17           | -0.14           | -0.08           | -0.04            |
| Phytomass                            | 0.85  | -0.41 | 0.01  | -0.29           | -0.36 | 0.27  | 0.27             | -0.04           | 0.22            | -0.51           | 0.41             |
| Org. C in soil, 0-30 cm              | -0.40 | 0.05  | 0.53  | 0.02            | 0.06  | -0.20 | -0.11            | 0.04            | -0.11           | 0.19            | -0.17            |
| Org. C in soil, 0-100 cm             | -0.39 | 0.05  | 0.58  | 0.00            | 0.05  | -0.23 | -0.07            | 0.03            | -0.08           | 0.16            | -0.19            |
| Permafrost                           | 0.26  | -0.11 | 0.05  | -0.21           | -0.20 | -0.10 | 0.27             | -0.19           | -0.16           | -0.02           | -0.03            |
|                                      | Sc    | Ti    | V     | Cr              | Mn    | Fe    | Co               | Ni              | Cu              | Zn              | Ga               |
| Swatershed                           | 0.15  | -0.36 | -0.26 | -0.33           | -0.26 | -0.17 | -0.32            | -0.32           | -0.24           | -0.30           | 0.24             |
| Dark Needleleaf                      | -0.17 | 0.00  | -0.17 | -0.08           | -0.16 | 0.04  | -0.06            | -0.26           | -0.30           | -0.15           | 0.29             |
| Light coniferous and broadleaf mixed | 0.45  | -0.22 | -0.55 | 0.12            | 0.45  | 0.56  | 0.21             | -0.67           | -0.69           | -0.17           | -0.04            |
| Decid Needleleaf                     | 0.04  | 0.03  | 0.02  | -0.05           | -0.20 | 0.09  | -0.15            | -0.35           | -0.36           | -0.37           | -0.37            |
| Tundra                               | -0.14 | -0.17 | 0.21  | 0.03            | -0.14 | -0.43 | -0.30            | 0.58            | 0.61            | 0.32            | 0.20             |
| Riparian                             | -0.08 | -0.17 | -0.21 | -0.02           | 0.03  | -0.10 | 0.09             | 0.55            | 0.43            | 0.09            | 0.29             |
| Bogs and Water                       | -0.25 | 0.46  | 0.25  | -0.07           | 0.00  | -0.01 | 0.40             | 0.18            | 0.18            | 0.14            | 0.03             |
| Burns                                | 0.10  | -0.20 | -0.03 | -0.31           | -0.36 | -0.12 | -0.44            | -0.27           | -0.22           | -0.34           | 0.34             |
| Phytomass                            | 0.15  | -0.07 | -0.07 | -0.14           | -0.32 | 0.06  | -0.32            | -0.39           | -0.41           | -0.41           | -0.05            |
| Org. C in soil, 0-30 cm              | 0.49  | 0.02  | -0.05 | 0.01            | 0.49  | 0.18  | 0.49             | 0.03            | 0.04            | 0.37            | 0.02             |
| Org. C in soil, 0-100 cm             | 0.52  | 0.01  | -0.08 | 0.00            | 0.50  | 0.21  | 0.48             | -0.01           | -0.01           | 0.37            | 0.06             |
|                                      | Ge    | As    | Se    | Rb              | Sr    | Y     | Zr               | Nb              | Mo              | Cd              | Sb               |
| Swatershed                           | -0.33 | -0.42 | 0.19  | -0.13           | 0.00  | -0.12 | -0.29            | -0.21           | -0.15           | 0.17            | 0.06             |
| Dark Needleleaf                      | -0.05 | -0.33 | -0.34 | 0.51            | -0.27 | -0.06 | 0.06             | 0.15            | -0.25           | -0.04           | -0.35            |
| Light coniferous and broadleaf mixed | 0.18  | 0.15  | -0.28 | -0.37           | -0.07 | -0.39 | -0.52            | -0.21           | 0.49            | 0.74            | 0.16             |

|                                             |           |           |           |           |           |          |           |           |           |          |       |
|---------------------------------------------|-----------|-----------|-----------|-----------|-----------|----------|-----------|-----------|-----------|----------|-------|
| <b>Decid Needleleaf</b>                     | -0.06     | 0.30      | -0.25     | -0.13     | 0.53      | -0.25    | 0.06      | 0.22      | -0.38     | -0.29    | -0.59 |
| <b>Tundra</b>                               | 0.07      | -0.30     | 0.45      | 0.05      | -0.12     | 0.47     | 0.13      | -0.33     | -0.08     | -0.26    | 0.32  |
| <b>Riparian</b>                             | 0.21      | -0.27     | 0.43      | 0.19      | 0.11      | 0.33     | 0.00      | -0.12     | 0.08      | 0.03     | 0.40  |
| <b>Bogs and Water</b>                       | -0.20     | 0.09      | -0.10     | 0.31      | -0.22     | -0.07    | 0.27      | 0.46      | 0.05      | -0.08    | -0.02 |
| <b>Burns</b>                                | -0.12     | -0.42     | 0.04      | 0.16      | 0.03      | -0.02    | -0.22     | -0.15     | -0.17     | 0.09     | -0.03 |
| <b>Phytomass</b>                            | -0.03     | 0.01      | -0.15     | -0.01     | 0.40      | -0.17    | -0.04     | 0.11      | -0.34     | -0.11    | -0.43 |
| <b>Org. C in soil, 0-30 cm</b>              | 0.15      | -0.15     | 0.21      | 0.14      | -0.07     | -0.04    | -0.06     | -0.09     | 0.84      | 0.59     | 0.54  |
| <b>Org. C in soil, 0-100 cm</b>             | 0.16      | -0.15     | 0.21      | 0.15      | -0.09     | -0.05    | -0.09     | -0.12     | 0.84      | 0.64     | 0.55  |
| <b>Permafrost</b>                           | -0.05     | -0.33     | -0.08     | 0.34      | -0.03     | 0.08     | -0.12     | -0.14     | -0.16     | -0.09    | -0.14 |
|                                             | <b>Cs</b> | <b>Ba</b> | <b>La</b> | <b>Ce</b> | <b>Hf</b> | <b>W</b> | <b>Pb</b> | <b>Bi</b> | <b>Th</b> | <b>U</b> |       |
| <b>Swatershed</b>                           | 0.09      | 0.06      | 0.31      | 0.50      | -0.25     | -0.35    | 0.05      | 0.28      | -0.17     | -0.15    |       |
| <b>Dark Needleleaf</b>                      | -0.03     | 0.37      | 0.27      | 0.31      | 0.14      | -0.47    | 0.17      | -0.09     | 0.34      | -0.27    |       |
| <b>Light coniferous and broadleaf mixed</b> | -0.08     | 0.58      | -0.18     | -0.01     | -0.38     | 0.02     | 0.14      | 0.75      | -0.20     | -0.68    |       |
| <b>Deciduos Needleleaf</b>                  | 0.63      | 0.18      | -0.22     | -0.30     | 0.20      | 0.03     | -0.25     | -0.24     | -0.01     | -0.27    |       |
| <b>Tundra</b>                               | -0.16     | -0.65     | 0.24      | 0.17      | -0.09     | 0.24     | -0.33     | -0.27     | -0.20     | 0.59     |       |
| <b>Riparian</b>                             | -0.15     | 0.06      | 0.24      | 0.20      | -0.03     | -0.28    | 0.08      | 0.04      | 0.01      | 0.37     |       |
| <b>Bogs and Water</b>                       | -0.27     | 0.12      | -0.04     | -0.03     | 0.29      | -0.28    | 0.51      | -0.12     | 0.44      | 0.10     |       |
| <b>Burns</b>                                | -0.07     | 0.15      | 0.41      | 0.49      | -0.18     | -0.32    | 0.16      | 0.17      | -0.07     | -0.10    |       |
| <b>Phytomass</b>                            | 0.45      | 0.26      | 0.09      | 0.08      | 0.09      | -0.20    | -0.06     | -0.04     | 0.01      | -0.28    |       |
| <b>Org. C in soil, 0-30 cm</b>              | -0.16     | 0.05      | -0.14     | -0.10     | -0.05     | 0.25     | 0.22      | 0.57      | 0.00      | -0.02    |       |
| <b>Org. C in soil, 0-100 cm</b>             | -0.21     | 0.08      | -0.11     | -0.04     | -0.08     | 0.22     | 0.25      | 0.62      | 0.00      | -0.06    |       |
| <b>Permafrost</b>                           | -0.04     | 0.07      | 0.33      | 0.28      | -0.07     | -0.33    | 0.06      | -0.04     | -0.03     | -0.03    |       |

**Table S6.** Results of PCA of ~65 hydrochemical and 16 land cover variables in ~ 60 sampling points of the main stem and tributaries of the Ket and Taz River basin, collected during summer baseflow. Significant ( $p < 0.05$ ) correlations are given in red and most significant ( $p < 0.01$ ) are highlighted in pink.

|                 | Factor 1 | Factor 2 | Factor 3 |
|-----------------|----------|----------|----------|
| pH              | -0.26    | -0.26    | -0.74    |
| O <sub>2</sub>  | 0.23     | 0.23     | -0.31    |
| Cond            | -0.47    | 0.14     | -0.81    |
| Bact            | -0.06    | -0.63    | 0.05     |
| Cl              | 0.00     | -0.44    | -0.14    |
| SO <sub>4</sub> | 0.80     | 0.14     | -0.32    |
| DIC             | -0.53    | 0.13     | -0.76    |
| DOC             | 0.49     | 0.52     | 0.29     |
| PON             | -0.42    | -0.17    | -0.51    |
| POC             | -0.43    | -0.31    | -0.38    |
| SUVA            | -0.27    | -0.44    | 0.26     |
| Li              | -0.20    | 0.35     | -0.54    |
| Be              | 0.81     | 0.24     | 0.16     |
| B               | -0.21    | 0.09     | -0.33    |
| Na              | -0.08    | -0.72    | -0.06    |
| Mg              | -0.13    | -0.92    | 0.04     |
| Al              | 0.76     | 0.44     | 0.24     |
| Si              | -0.14    | -0.90    | 0.04     |
| P               | -0.32    | -0.62    | -0.01    |
| Ca              | -0.15    | -0.90    | 0.05     |
| Sc              | -0.06    | 0.07     | -0.58    |
| Ti              | 0.84     | 0.13     | -0.11    |
| V               | 0.46     | -0.66    | -0.11    |
| Cr              | 0.81     | 0.13     | 0.15     |
| Mn              | -0.39    | -0.13    | -0.17    |
| Fe              | -0.15    | -0.82    | 0.13     |
| Co              | 0.07     | -0.22    | 0.07     |
| Ni              | 0.22     | 0.18     | 0.05     |
| Cu              | 0.76     | -0.03    | -0.07    |
| Zn              | 0.09     | 0.43     | 0.28     |
| Ga              | 0.91     | 0.16     | 0.15     |
| Ge              | 0.55     | -0.40    | 0.26     |
| As              | -0.37    | -0.34    | -0.09    |
| Se              | 0.83     | 0.21     | -0.37    |
| Rb              | 0.03     | 0.49     | 0.15     |
| Sr              | -0.44    | 0.34     | -0.73    |
| Y               | 0.94     | -0.15    | 0.07     |
| Zr              | 0.90     | 0.09     | -0.17    |

  

|                  | Factor 1 | Factor 2 | Factor 3 |
|------------------|----------|----------|----------|
| Nb               | 0.81     | 0.31     | -0.04    |
| Mo               | -0.32    | -0.11    | -0.29    |
| Cd               | 0.39     | 0.35     | 0.34     |
| Sb               | 0.76     | 0.35     | 0.11     |
| Cs               | 0.22     | 0.17     | -0.17    |
| Ba               | -0.02    | 0.78     | -0.48    |
| La               | 0.84     | 0.11     | 0.17     |
| Ce               | 0.90     | 0.13     | 0.25     |
| Pr               | 0.95     | 0.05     | 0.17     |
| Nd               | 0.96     | 0.01     | 0.16     |
| Sm               | 0.97     | -0.01    | 0.13     |
| Eu               | 0.94     | 0.05     | 0.12     |
| Gd               | 0.97     | -0.04    | 0.09     |
| Dy               | 0.97     | -0.06    | 0.08     |
| Ho               | 0.98     | -0.07    | 0.04     |
| Er               | 0.97     | -0.09    | 0.04     |
| Yb               | 0.95     | -0.09    | 0.05     |
| Lu               | 0.96     | -0.08    | -0.04    |
| Hf               | 0.91     | 0.20     | -0.13    |
| W                | -0.09    | -0.07    | -0.17    |
| Tl               | 0.22     | 0.01     | -0.20    |
| Pb               | 0.31     | 0.23     | 0.03     |
| Bi               | 0.28     | 0.26     | -0.23    |
| Th               | 0.78     | 0.32     | 0.18     |
| U                | 0.25     | 0.16     | -0.72    |
| Swatershed       | 0.07     | -0.17    | 0.06     |
| Dark Needleleaf  | -0.12    | 0.55     | 0.04     |
| Light Needleleaf | -0.28    | 0.74     | 0.34     |
| Broadleaf        | 0.34     | 0.09     | -0.39    |
| Mixed            | 0.10     | -0.20    | -0.10    |
| Riparian         | -0.10    | 0.19     | -0.14    |
| Bogs             | -0.08    | -0.54    | 0.11     |
| Water            | -0.02    | -0.49    | 0.09     |
| Recent Burns     | -0.14    | 0.30     | 0.29     |
| Phytomass        | 0.06     | 0.88     | -0.12    |
| Rocks > 50 My    | 0.03     | -0.21    | 0.06     |
| Rocks 50-25 My   | 0.01     | -0.18    | 0.10     |
| Rocks < 25 My    | 0.12     | 0.78     | 0.13     |
| Precipitation    | -0.29    | -0.20    | 0.51     |
| MAAT             | 0.02     | 0.97     | -0.10    |
| Expl.Var         | 26.28    | 13.67    | 6.56     |
| Prp.Totl         | 0.31     | 0.16     | 0.08     |

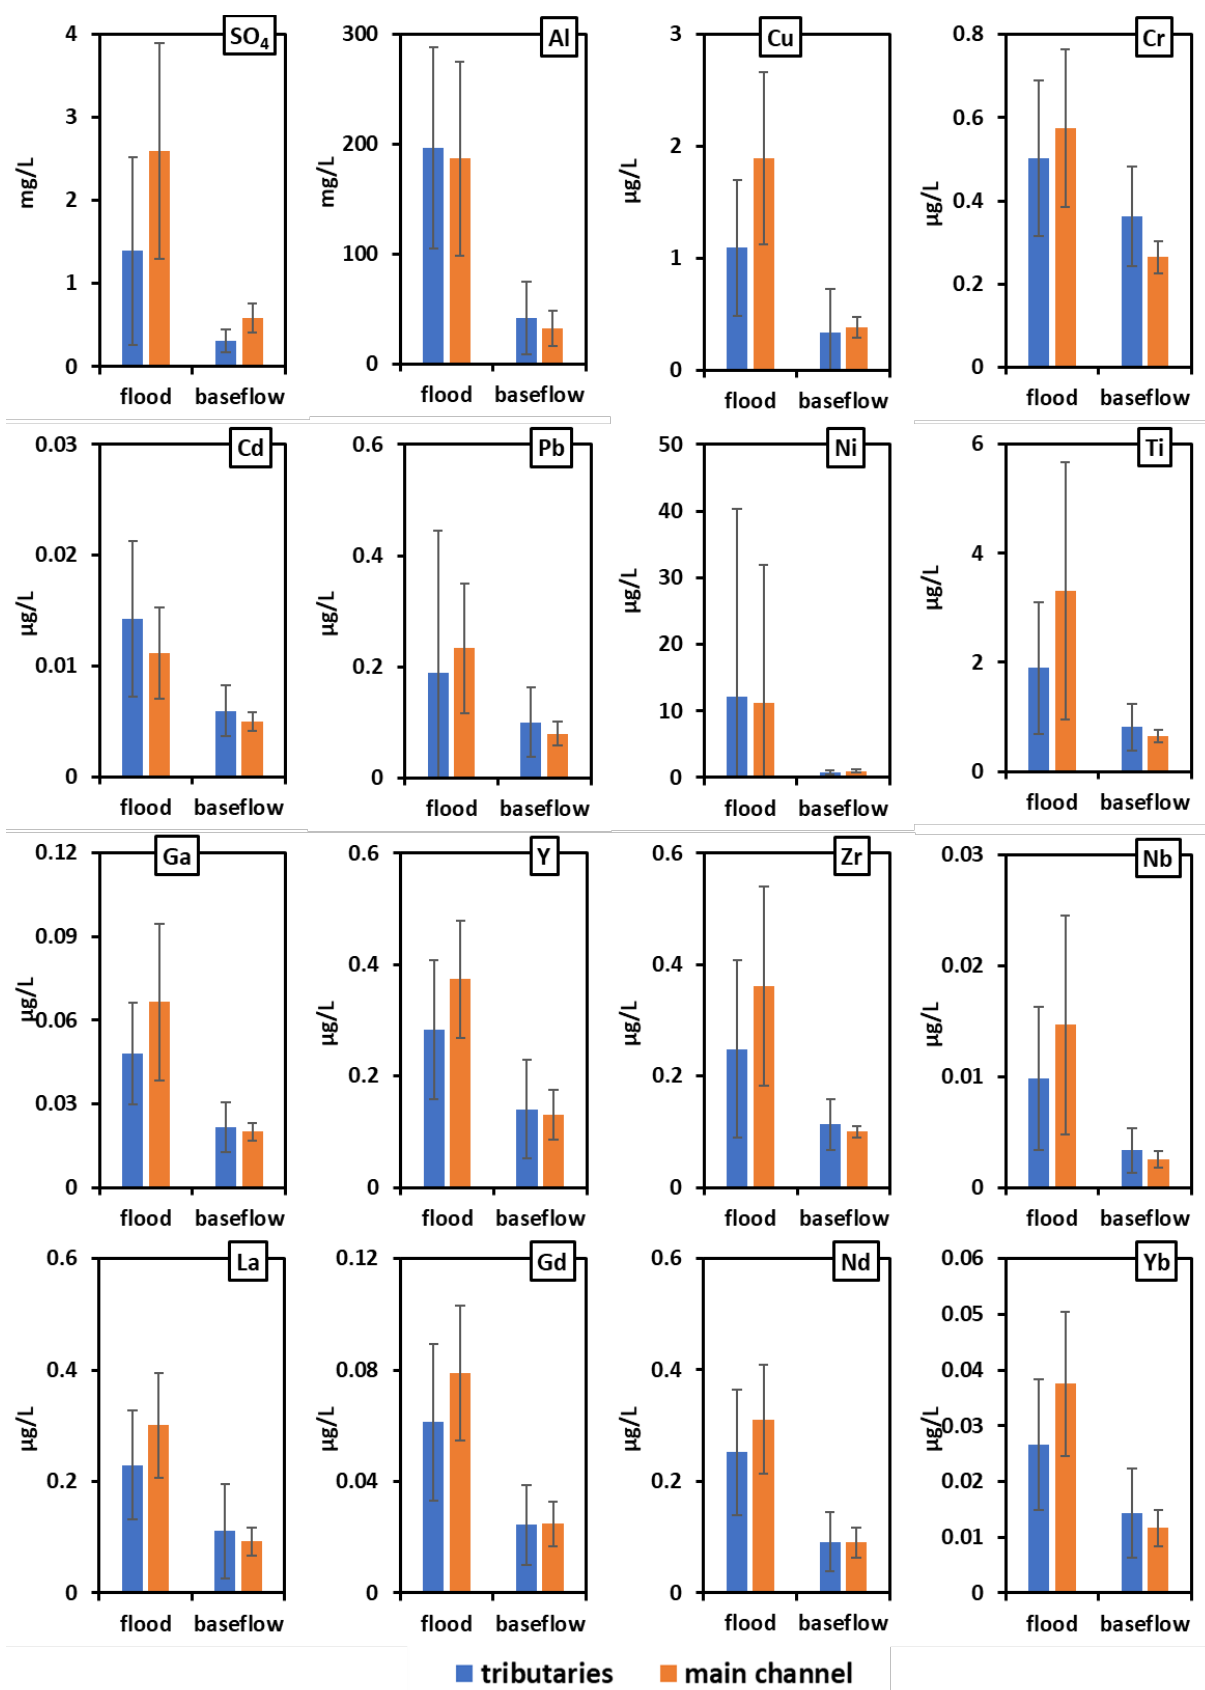

**Figure S1.** Seasonal mean±SD concentration elements exhibiting higher concentrations during spring flood compared to summer baseflow in tributaries and main channel Ket' in spring flood (blue) and summer (early fall) baseflow (orange).

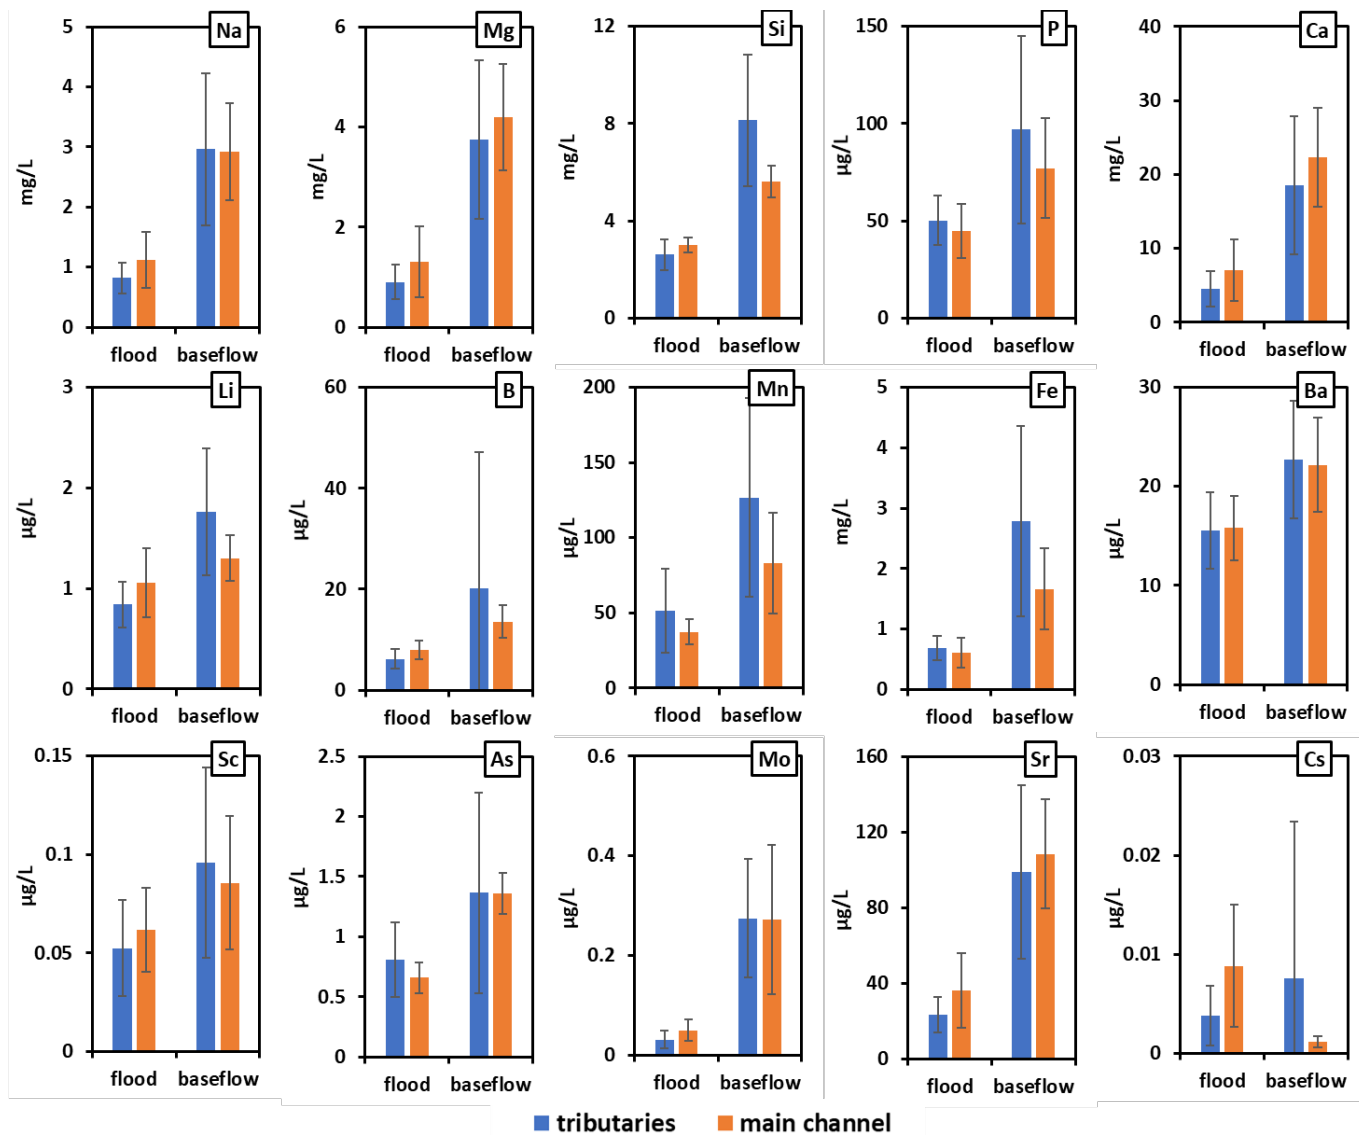

**Figure S1, continued.** Seasonal mean $\pm$ SD concentration elements exhibiting lower concentrations during spring flood compared to summer baseflow in tributaries and main channel Ket' in spring flood (blue) and summer (early fall) baseflow (orange).

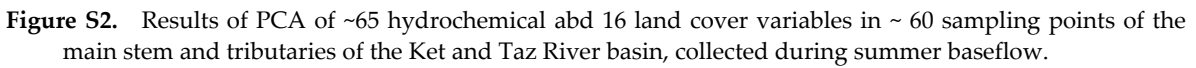

Supplement: s1 [file s1]
